# Supplementary material for: Structure and dynamics of dynamic covalent cross-linked PEOs and PEO/LiPF6 electrolytes: a coarse-grained simulation study
Source: Royal Society of Chemistry journal article supplement (doi:10.1039/d3cp00905j), 2023-01-01
Supplement: d3cp00905j1.pdf [file d3cp00905j1.pdf]

## Supplementary information

### Structure and dynamics of dynamic covalent cross-linked PEOs and PEO/LiPF<sub>6</sub> electrolyte: A coarse-grained simulation study

Tongfei Wu\*, Ping Zhang

Guangzhou Key Laboratory of Flexible Electronic Materials and Wearable Devices, School of Materials Science and Engineering, Sun Yat-sen University, Guangzhou, 510275 China

\* E-mail: wutongfei@mail.sysu.edu.cn

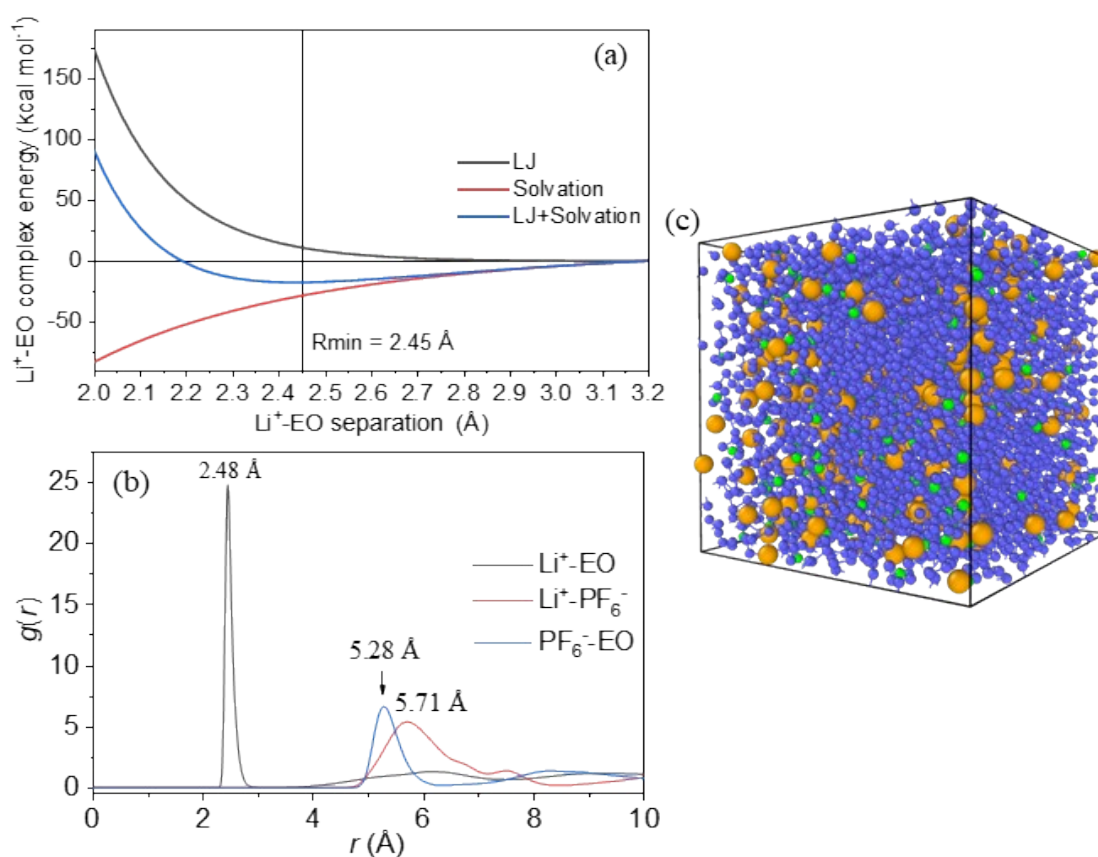

**Figure S1.** (a) The hybrid Li<sup>+</sup>-EO pairwise potential energies as a function of Li<sup>+</sup>-EO separation with  $S_{EO+} = 34\epsilon$ . (b) Radial distribution functions (RDFs) for PEO<sub>16</sub>-LiPF<sub>6</sub>. (c) A snapshot of the simulation box to demonstrate the distribution of Li<sup>+</sup> (Green) and PF<sub>6</sub><sup>-</sup> (Khaki) in PEO<sub>16</sub>-LiPF<sub>6</sub>.

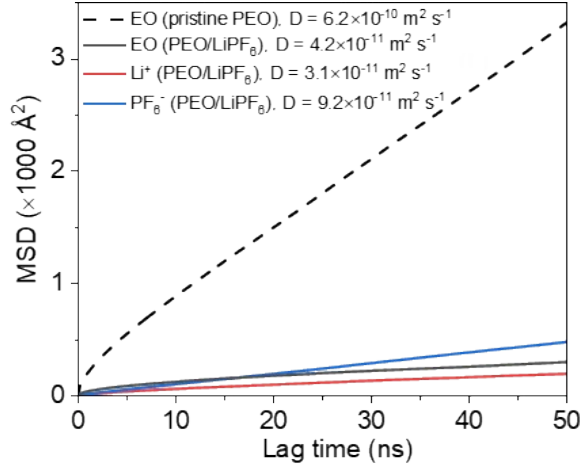

**Figure S2.** Mean-squared displacements (MSDs) for linear PEO and PEO<sub>16</sub>-LiPF<sub>6</sub>. MSDs were calculated from the following expression:<sup>[1]</sup>

$$MSD = \left\langle \frac{1}{N} \sum_{i=1}^N |r_i(t) - r_i(0)|^2 \right\rangle \quad (1)$$

where  $N$  is the number of particles the MSD is calculated over and  $r_i(t)$  is the coordinate of particle  $i$  at time  $t$ , while  $\langle \rangle$  represents ensemble averaging.

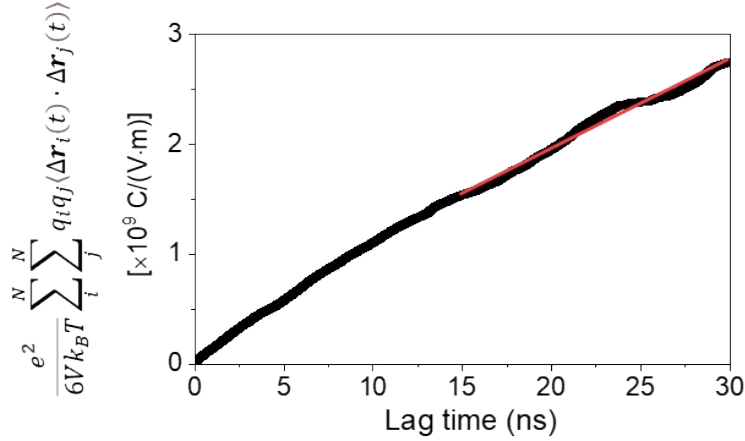

**Figure S3.** The collective displacement  $\left( \frac{e^2}{6Vk_B T} \sum_i \sum_j q_i q_j \langle \Delta r_i(t) \cdot \Delta r_j(t) \rangle \right)$  of ions for PEO<sub>16</sub>-LiPF<sub>6</sub> used to calculate ionic conductivity ( $\lambda$ ).  $\lambda$  was calculated from the equilibrium dynamics using the following relation:<sup>[2]</sup>

$$\lambda = \frac{e^2}{6Vk_B T} \lim_{t \rightarrow \infty} \frac{d}{dt} \sum_i \sum_j q_i q_j \langle \Delta r_i(t) \cdot \Delta r_j(t) \rangle \quad (2)$$

where  $e$  is the electron charge ( $1.6022 \times 10^{-19} \text{C}$ ),  $V$  is the volume of the simulation box,  $k_B$  is Boltzmann's constant ( $8.6173 \times 10^{-5} \text{ eV K}^{-1}$ ),  $T$  is the temperature (353 K),  $t$  is time,  $q_i$  and  $q_j$  are the charges over ions  $i$  and  $j$  in electrons,  $\Delta r_i(t)$  is the displacement of ion  $i$  during time  $t$ , the summation

is performed over all ions,  $N$  is the number of cations plus anions, and  $\langle \rangle$  denotes the ensemble average.

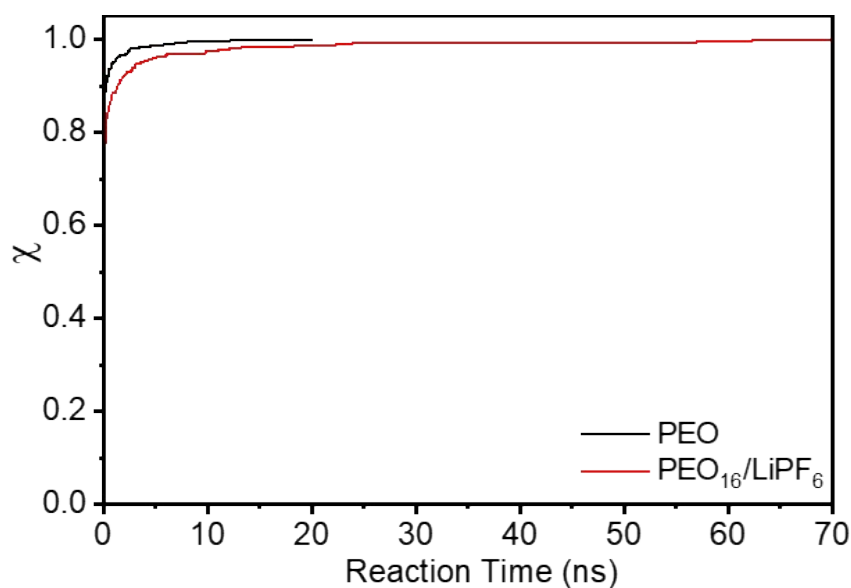

**Figure S4.** The fractional conversion ( $\chi$ ) as a function of reaction time for the preparation of dynamic covalent cross-linked PEO and PEO<sub>16</sub>-LiPF<sub>6</sub> electrolyte at 353 K with  $E_a = 0.1\epsilon$ .

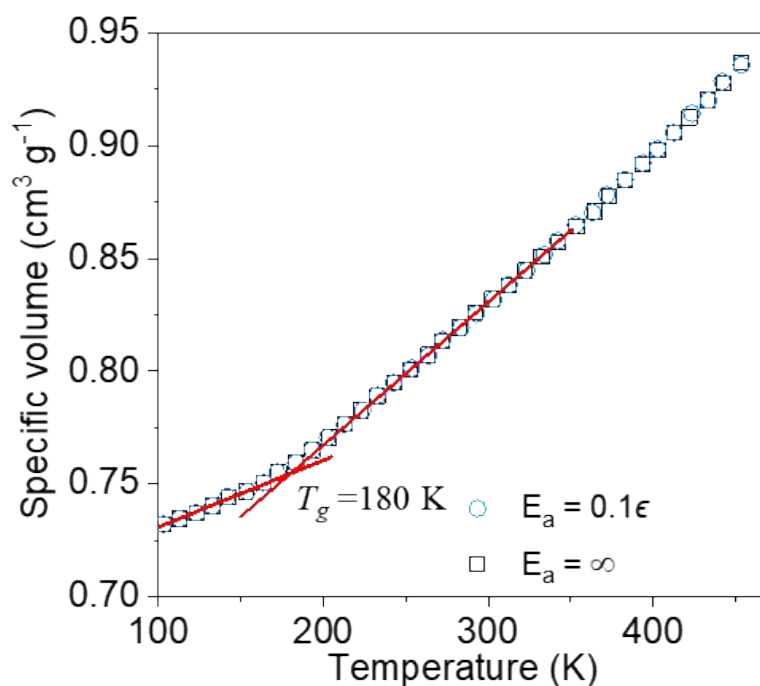

**Figure S5.** The time-average specific volume of cross-linked PEOs as a function of temperature to determine the glass transition temperature ( $T_g$ ) by finding the point of intersection of the fitted lines in the rubbery and glassy regions.<sup>[3]</sup>

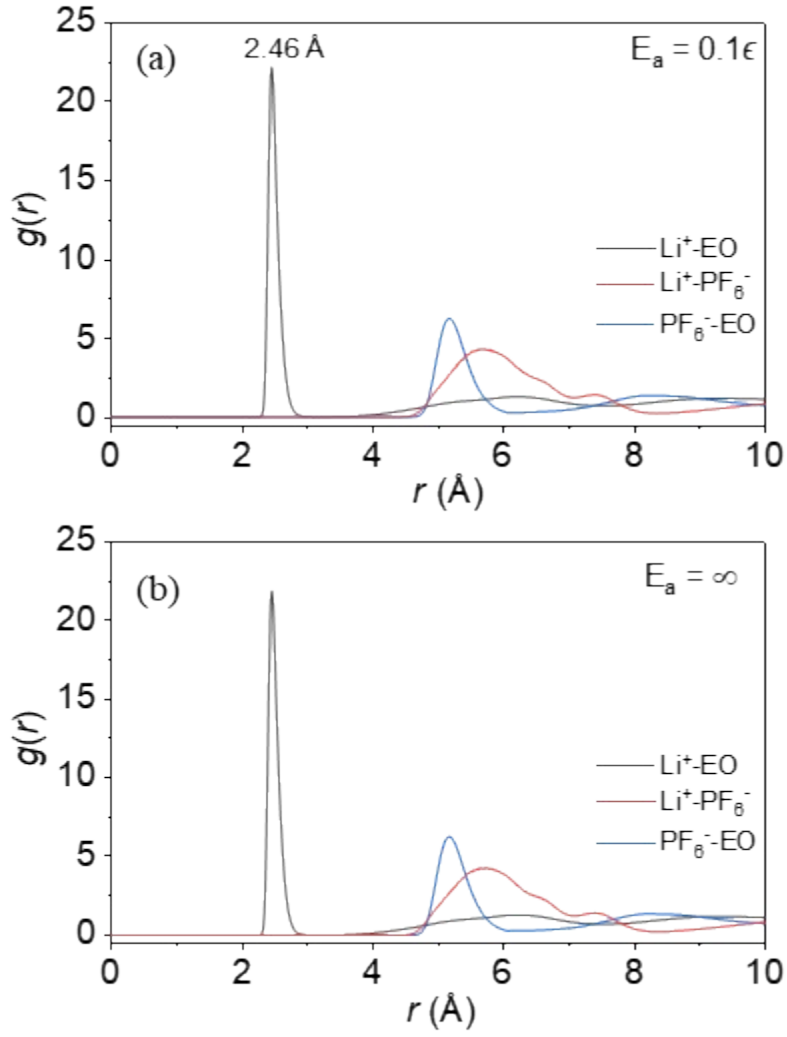

Figure S6. RDFs for cross-linked PEO<sub>16</sub>-LiPF<sub>6</sub> electrolytes.

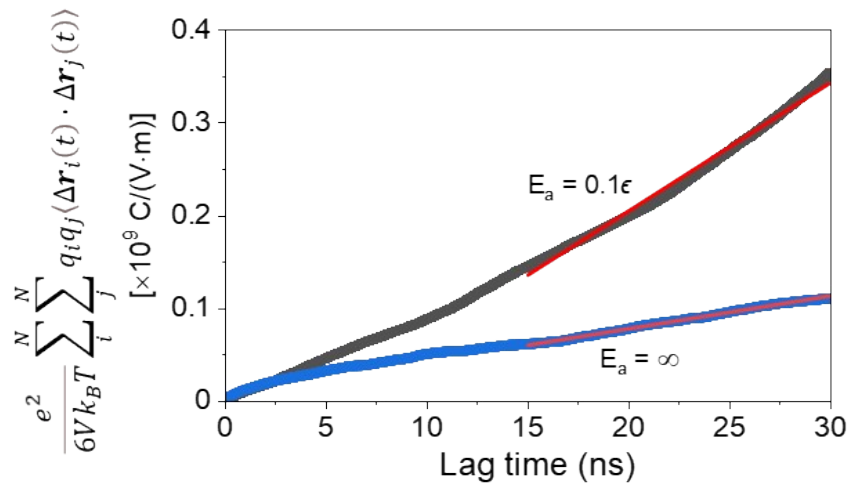

Figure S7. The collective displacement  $\left( \frac{e^2}{6Vk_B T} \sum_i^N \sum_j^N q_i q_j \langle \Delta r_i(t) \cdot \Delta r_j(t) \rangle \right)$  of ions for cross-linked PEO<sub>16</sub>-LiPF<sub>6</sub> electrolytes to calculate ionic conductivity.

## References:

- [1] E. J. Maginn, R. A. Messerly, D. J. Carlson, D. R. Roe and J. R. Elliot, *Living J. Comp. Mol. Sci.* **1** (1), 6324 (2018).
- [2] O. Borodin and G. D. Smith, *J. Phys. Chem. B* **113** (6), 1763-1776 (2009).
- [3] F. Khabaz and R. Khare, *J. Phys. Chem. B*, **119** (44), 14261-14269 (2015).
